# Supplementary material for: Meta-analysis of the effect of probiotics or synbiotics on the risk factors in patients with coronary artery disease
Source: Front Cardiovasc Med. 2023 Aug 2;10:1154888. doi: 10.3389/fcvm.2023.1154888 (PMC10436219; doi:10.3389/fcvm.2023.1154888)
Supplement: Supplementary file 8 [file Datasheet2.xlsx]

## Sheet: Data
Author	Title	Year	Population	Probiotics	Dose		Time	all	nc	tc	cbmean	cbsd	tbmean	tbsd	cfmean	cfse	tfmean	tfsd
Moludi J	The effects of co-administration of probiotics and prebiotics on chronic inflammation, and depression symptoms in patients with coronary artery diseases: a randomized clinical trial	2022	CAD	Lactobacillus rhamnosus;inulin	1.9×109/day, 15 g inulin/day	LDL (mg/dL)	2 months	48	24	24	101.53	50.29	91.18	48.49	76.31	35.76	67.61	44.37
						TG (mg/dL)	2 months	48	24	24	172.95	55.64	162.61	55.16	169.72	97.3	123.8	90.96
						Total cholesterol (mg/dL)	2 months	48	24	24	164.14	29.45	176.19	41.52	180.36	103.6	150.05	94.19
						HDL (mg/dL)	2 months	48	24	24	41.77	5.53	41.9	7.16	41.81	8.83	45.23	9.12
						FPG (mg/dL)	2 months	48	24	24	132.59	79.73	108.76	28.32	125.91	57.02	99.95	30.26
						SBP (mmHg)	2 months	48	24	24	127.41	18.65	121.9	17.42	122.95	15.09	114.48	25.7
						DBP (mmHg)	2 months	48	24	24	81.77	17.66	80.33	13.66	83.41	24.36	79.71	13.76
						hs-CRP (mg/dL)	2 months	48	24	24	2.73	1.81	3	1.82	3.55	3.34	1.31	0.98
						LPS (EU/L)	2 months	48	24	24	26.96	20.1	33.35	25.58	27.27	30.06	11.33	4.97
Sun, B	Bifidobacterium lactis Probio-M10 Adjuvant Treatment Confers Added Benefits to Patients with Coronary Artery Disease via Target Modulation of the Gut-Heart/-Brain Axes	2022	CAD	Bifidobacterium lactis Probio-M8	1.9×109/day	LDL (mmol/L)	6 months	60	24	36	138.05	9.28	131.86	14.69	101.31	7.34	82.36	7.34
						TMAO (ng/ul)	6 months	60	24	36	64.32	44.59	44.05	28.6	79.73	56.49	34.08	14.76
Moludi J	Effect of probiotic supplementation along with calorie restriction on metabolic endotoxemia, and inflammation markers in coronary artery disease patients: a double blind placebo controlled randomized clinical trial	2021	CAD	Lactobacillus rhamnosus GG (LGG)	1.9×109/day	LPS (ng/ml)	12 weeks	44	22	22	26.18	16.85	21.92	11.64	23.22	12.22	16.04	6.8
Moludi J	Probiotics Supplementation on Cardiac Remodeling Following Myocardial Infarction: a Single-Center Double-Blind Clinical Study	2021	MI	Lactobacillus rhamnosus GG (LGG)	1.9×109/day	TMAO (pg/ml)	3 months	44	22	22	39.81	14.9	34.56	18.55	34.72	36.61	17.3	6.67
						hs-CRP (mg/dL)	3 months	44	22	22	2.6	1.2	3.1	1.5	1.95	0.98	1.65	0.67
Moludi J	Interactive Effect of Probiotics Supplementation and Weight Loss Diet on Metabolic Syndrome Features in Patients With Coronary Artery Diseases: A Double-Blind, Placebo-Controlled, Randomized Clinical Trial	2021	CAD	Lactobacillus rhamnosus GG (LGG)	1.9×109/day	Total cholesterol (mg/dL)	12 weeks	44	22	22	175.8	41.8	168.1	28.02	169.3	46.3	137.7	42.6
						TG (mg/dL)	12 weeks	44	22	22	165.41	58.9	167.7	46.4	152	55.1	154.8	56.3
						LDL (mg/dL)	12 weeks	44	22	22	100.64	43.4	93.44	31.68	95.2	47.9	68.7	40.7
						HDL (mg/dL)	12 weeks	44	22	22	42	7.4	40.95	4.89	44.2	9.1	43	4.7
						FPG (mg/dL)	12 weeks	44	22	22	109.31	29.3	121.05	59.1	99.35	24.4	103.14	13.7
						DBP (mm/Hg)	12 weeks	44	22	22	78.26	13.9	82.9	10.9	77.7	13.7	78.48	7.6
						SBP (mm/Hg)	12 weeks	44	22	22	121.74	15.99	128.4	19.6	119.3	14.84	120.7	13.8
Moludi J	The Effect of Probiotic Supplementation on Depressive Symptoms and Quality of Life in Patients after Myocardial Infarction: Results of a Preliminary Double-Blind Clinical Trial	2019	CAD	Lactobacillus rhamnosus GG (LGG)	1.9 ×109/day	hs-CRP (mg/L)	12 weeks	44	22	22	2.6	1.7	3.01	1.75	1.93	1.27	1.26	0.7
Raygan F	The effects of probiotic and selenium co-supplementation on mental health parameters and metabolic profiles in type 2 diabetic patients with coronary heart disease: a randomized, double-blind, placebo-controlled trial	2018	T2DM and CAD.	Lactobacillus acidophilus; Lactobacillus reuteri; Lactoba-cillus fermentum; Bifidobacterium bifidum; selenium;	8×109/day, 200 mg/day selenium	FPG (mg/dL)	12 weeks	54	27	27	134.7	43.9	142	41.9	132.6	43.1	129.5	45.5
						Insulin (mIU/mL)	12 weeks	54	27	27	11.5	4.8	12.9	2.5	12.7	4.9	10.3	2.7
						HOMA-IR	12 weeks	54	27	27	3.8	2.1	4.5	1.4	4.1	1.9	3.6	1.4
						QUICKI	12 weeks	54	27	27	0.32	0.02	0.3	0.01	0.31	0.01	0.32	0.01
						Triglycerides (mg/dL)	12 weeks	54	27	27	179.9	68.2	176.8	76.4	179.1	67.9	143.7	62.8
						Total cholesterol (mg/dL)	12 weeks	54	27	27	171.6	41.4	169.6	29.8	174.9	49.3	154.6	24.3
						LDL-cholesterol (mg/dL)	12 weeks	54	27	27	90	42.7	87.5	24.5	91.9	50.5	79.7	17.6
						HDL-cholesterol (mg/dL)	12 weeks	54	27	27	45.7	8.3	46.7	10.7	47.3	8.7	46.2	9.4
						VLDL-cholesterol (mg/dL)	12 weeks	54	27	27	36	13.6	35.3	15.3	35.8	13.6	28.7	12.6
						NO (μmol/L)	12 weeks	54	27	27	36	8.7	36.6	5.7	35.4	8.3	43.6	6.1
						TAC (mmol/L)	12 weeks	54	27	27	959.6	204.7	1062.2	98.3	944.5	194	1141.8	102.9
						GSH (mmol/L)	12 weeks	54	27	27	511.7	117.7	542.3	73.9	491.9	167.8	669.5	149.9
						hs-CRP (ng/mL)	12 weeks	54	27	27	2683.9	1812.5	2618.5	1395.9	3321.6	2667.4	2133.3	1127.6
						SBP (mmHg)	12 weeks	54	27	27	136.7	9.3	134.2	12.6	135.9	7.6	132.4	9.6
						DBP (mmHg)	12 weeks	54	27	27	78.2	5.1	76.8	6.1	78.5	5.7	77.5	6.8
Raygan F	The effects of vitamin D and probiotic co-supplementation on mental health parameters and metabolic status in type 2 diabetic patients with coronary heart disease: A randomized, double-blind, placebo-controlled trial	2018	T2DM and CAD.	vitamin D3, Lactobacillus acidophilus, Bifidobacterium bifidum, Lactobacillus reuteri, Lactobacillus fermentum,	each 2×109CFU/day 50,000 IU/2 weeks	FPG (mg/dL)	12 weeks	60	30	30	126.8	34.9	121.3	49.7	124.3	34.8	114.9	46.6
						Insulin (mIU/mL)	12 weeks	60	30	30	13.1	7.8	13.7	7.3	13.3	7.9	10.9	7.4
						HOMA-IR	12 weeks	60	30	30	4	2.5	4.2	3.7	3.9	2.5	3.2	2.6
						QUICKI	12 weeks	60	30	30	0.32	0.02	0.32	0.03	0.32	0.02	0.35	0.06
						Triglycerides (mg/dL)	12 weeks	60	30	30	153.5	65.4	149.2	92.3	153.6	61.6	137.4	61.5
						Total cholesterol (mg/dL)	12 weeks	60	30	30	146.7	29.1	138.8	41.7	146.9	33.9	144.2	33.3
						LDL-cholesterol (mg/dL)	12 weeks	60	30	30	72.6	18.7	68.1	29.1	73.3	23.9	73.5	28.2
						HDL-cholesterol (mg/dL)	12 weeks	60	30	30	43.4	8.2	40.9	8.2	42.8	7.4	43.2	8.2
						VLDL-cholesterol(mg/dL)	12 weeks	60	30	30	30.7	13.1	29.8	18.5	30.7	12.3	27.5	12.3
						hs-CRP (ng/mL)	12 weeks	60	30	30	3430.9	2939.3	3410	2384.9	3691.4	3024.7	2460	2135.8
						NO(μmol/L)	12 weeks	60	30	30	37.7	8.2	38.5	3.9	36.3	8.7	40.2	3.3
						TAC (mmol/L)	12 weeks	60	30	30	1032.8	367.7	987.9	91.7	915.8	284.5	1000.5	91.4
						GSH(μmol/L)	12 weeks	60	30	30	510.6	123	686.4	80.5	498.4	158.5	704.4	142.7
						SBP (mmHg)	12 weeks	60	30	30	129.2	8.5	132.7	7.9	128.2	9.9	132	8.4
						DBP (mmHg)	12 weeks	60	30	30	78	8.3	76.8	7.2	76.7	7.8	76.1	7
Raygan F	The effects of probiotic supplementation on metabolic status in type 2 diabetic patients with coronary heart disease	2018	T2DM and CAD.	Bifidobacterium bifidum Lactobacillus casei Lactobacillus acidophilus	each 2×109CFU/day	FPG (mg/dL)	12 weeks	60	30	30	128.8	47.2	133.8	43.6	138.2	33.5	120.6	38.7
						Insulin (mIU/mL)	12 weeks	60	30	30	13.8	8.6	14.3	5.6	14.7	8.5	13.1	5.2
						HOMA-IR	12 weeks	60	30	30	4.5	3.6	4.8	2.7	4.6	3.2	4.4	2.4
						QUICKI	12 weeks	60	30	30	0.32	0.03	0.31	0.02	0.31	0.02	0.31	0.02
						Triglycerides (mg/dL)	12 weeks	60	30	30	146.2	67.4	139	61.3	152.4	66.9	140.2	64.9
						Total cholesterol (mg/dL)	12 weeks	60	30	30	143.5	30.5	149.7	26.6	146.3	34	144.6	27.2
						LDL-cholesterol (mg/dL)	12 weeks	60	30	30	71.2	26.3	74.9	22	73	24.1	68.1	21.1
						HDL-cholesterol (mg/dL)	12 weeks	60	30	30	43.0	7.2	46.8	6.7	42.8	6.2	48.4	7.4
						VLDL-cholesterol (mg/dL)	12 weeks	60	30	30	29.2	13.5	27.8	12.3	30.5	13.4	28.1	13
						Total-/HDL-cholesterol ratio	12 weeks	60	30	30	3.4	0.8	3.2	0.6	3.4	0.7	3	0.6
						NO (µmol/L)	12 weeks	60	30	30	46.6	10	42.4	6.2	44.2	8.3	46.5	7.4
						TAC (mmol/L)	12 weeks	60	30	30	895.3	301.9	965.5	239.4	873.3	276.3	1044.4	254.9
						GSH (µmol/L)	12 weeks	60	30	30	506.3	96.5	586.2	156.3	505.3	107.9	629.4	169.5
						hs-CRP (mg/L)	12 weeks	60	30	30	4.8	2.5	5.1	2.8	4.9	2.6	4.3	2.6
						SBP (mmHg)	12 weeks	60	30	30	128.3	14.4	125.1	12.8	127	15.1	123.2	13.3
						DBP (mmHg)	12 weeks	60	30	30	79.3	8.8	77.9	6.9	78.2	8.5	76.2	8.0
Tajabadi-Ebrahimi	A Randomized Controlled Clinical Trial Investigating the Effect of Synbiotic Administration on Markers of Insulin Metabolism and Lipid Profiles in Overweight Type 2 Diabetic Patients with Coronary Heart Disease	2017	T2DM and CAD.	Lactobacillus acidophilus, Lactobacillus casei, Bifidobacterium bifidum, inulin,	each 2×109CFU/day 800 mg inulin	FPG (mg/dL)	12 weeks	60	30	30	125.3	51.1	149.4	60.8	144.5	72.3	129.7	40.5
						Insulin (mIU/mL)	12 weeks	60	30	30	16.5	8.9	16.2	7.9	19.8	10.2	15.5	8
						HOMA-IR	12 weeks	60	30	30	5.2	4	5.6	2.7	6.1	4.2	5.6	3.4
						QUICKI	12 weeks	60	30	30	0.31	0.03	0.3	0.02	0.3	0.02	0.3	0.02
						Triglycerides (mg/dL)	12 weeks	60	30	30	127.9	66.9	142	66.3	150.7	69.9	153.6	64.7
						VLDL-cholesterol (mg/dL)	12 weeks	60	30	30	25.6	13.4	28.4	13.2	30.1	14	30.7	12.9
						Total cholesterol (mg/dL)	12 weeks	60	30	30	141	29	144.5	25	147.7	32.5	149.1	25.8
						LDL-cholesterol (mg/dL)	12 weeks	60	30	30	68.6	23	70.2	20	72.9	23.5	70.7	23
						HDL-cholesterol (mg/dL)	12 weeks	60	30	30	46.8	7.4	45.9	6.3	44.6	5.9	47.7	6.9
						Total-/HDL-cholesterol ratio	12 weeks	60	30	30	3	0.6	3.2	0.6	3.3	0.7	3.2	0.5
